# Supplementary material
Source: PubMed Central journal article supplement (PMC7017776)
Supplement: rstb20190119supp1.pdf [file rstb20190119supp1.pdf]

## Supplementary Material: Co-production of adaptation services in the selected case studies

| Case study: Lautaret, French Alps                                                                                           |                                                                                                   |                                                                                                                                                                |                                                                                                          |                                                                                                                                                                                                              |                                                                                     |                                                                                                                                                                                  |
|-----------------------------------------------------------------------------------------------------------------------------|---------------------------------------------------------------------------------------------------|----------------------------------------------------------------------------------------------------------------------------------------------------------------|----------------------------------------------------------------------------------------------------------|--------------------------------------------------------------------------------------------------------------------------------------------------------------------------------------------------------------|-------------------------------------------------------------------------------------|----------------------------------------------------------------------------------------------------------------------------------------------------------------------------------|
| Adaptation service (AS)                                                                                                     | AS type                                                                                           | Ecosystem or land use                                                                                                                                          | Key ecosystem elements                                                                                   | Type 1 co-production (ecosystem and landscape management)                                                                                                                                                    | Type 2 co-production (mobilization, harvesting, physical access)                    | Type 3 co-production (appropriation, social access, appreciation)                                                                                                                |
| Novel crops                                                                                                                 | Novel ES                                                                                          | Cropping (terraces)                                                                                                                                            | Water, Soil, Biogeochemical cycling and biomass production, Sun                                          | What: soil and crop management; collective parcel allocation; irrigation                                                                                                                                     | What: production and harvest work and knowledge; collective equipment               | What: Consume local products; transform and market local products                                                                                                                |
|                                                                                                                             |                                                                                                   |                                                                                                                                                                |                                                                                                          | Who: Farmers, various residents (part time)                                                                                                                                                                  | Who: Farmers, various residents (part time)                                         | Who: farmers, marketing and sales staff, tourists and inhabitants                                                                                                                |
|                                                                                                                             |                                                                                                   |                                                                                                                                                                |                                                                                                          | Human factors: full or part time labour. Knowledge on traditional or new climate- and market-adapted crops and on practises (e.g. greenhouses, irrigation)                                                   | Human factors: full or part time labour. Knowledge on harvesting techniques.        | Human factors: knowledge on product preparation, packaging, communication and sales; preferences and values for local products, willingness to allocate money for local products |
|                                                                                                                             |                                                                                                   |                                                                                                                                                                |                                                                                                          | Social factors: Access to real estate: collective land allocation - Solidarity and ability to work together. Access to parcels (tracks)                                                                      | Social factors: Solidarity and ability to work together. Access to parcels (tracks) | Social factors: cooperative structure                                                                                                                                            |
|                                                                                                                             |                                                                                                   |                                                                                                                                                                |                                                                                                          | Manufactured factors: farming equipment (e.g. machinery, greenhouses, irrigation); technology and innovation for maintaining / upgrading terraces                                                            | Manufactured factors: farming equipment                                             | Manufactured factors: transport vehicles (for sales to nearby ski resorts or towns), selling infrastructure incl. cooperative building within easy tourist access                |
| Financial factors: Direct income from sales. Financial support for new activities: loans, innovation incentives. Subsidies? | Financial factors: Financial support for new activities: loans, innovation incentives. Subsidies? | Financial factors: Supply chain and market (network), communication and marketing skills, support for cooperative selling structure, equity in payment options |                                                                                                          |                                                                                                                                                                                                              |                                                                                     |                                                                                                                                                                                  |
| Erosion control                                                                                                             | Latent ES                                                                                         | mown terraces                                                                                                                                                  | soil physical properties, slope. plant root architectural traits, precipitation patterns (inc. extremes) | What: Maintain mown terraces; control stocking rate on grazed terraces                                                                                                                                       | What: None                                                                          | What: appreciate terraced slopes and reduced erosion (mudslide, water siltation) risk                                                                                            |
|                                                                                                                             |                                                                                                   |                                                                                                                                                                |                                                                                                          | Who: Farmers, motivated / skilled inhabitants (?)                                                                                                                                                            | Who: None                                                                           | Who: farmers, residents, tourists                                                                                                                                                |
|                                                                                                                             |                                                                                                   |                                                                                                                                                                |                                                                                                          | Human factors: full or part time labour. Knowledge on mowing and grazing practises with traditional or new livestock species                                                                                 | Human factors: None                                                                 | Human factors: values for traditional landscapes, communication                                                                                                                  |
|                                                                                                                             |                                                                                                   |                                                                                                                                                                |                                                                                                          | Social factors: collective organisation of livestock farming, collective mowing (possibly innovative with inhabitants and/or tourists), solidarity and ability to work together. Attachment to mown terraces | Social factors: None                                                                | Social factors: None                                                                                                                                                             |
|                                                                                                                             |                                                                                                   |                                                                                                                                                                |                                                                                                          | Manufactured factors: technology and innovation for mowing and for maintaining / rebuilding / upgrading terraces, access tracks to parcels                                                                   | Manufactured factors: None                                                          | Manufactured factors: None                                                                                                                                                       |
| Financial factors: Financial support from community. Subsidies, PES... Income from tourism                                  | Financial factors: None                                                                           | Financial factors: (avoided costs)                                                                                                                             |                                                                                                          |                                                                                                                                                                                                              |                                                                                     |                                                                                                                                                                                  |
| Resilience of fodder production                                                                                             | Persistent ES                                                                                     | mown terraces, P. paniculata grasslands                                                                                                                        | soil fertility, plant functional diversity (mown terraces), P. paniculata                                | What: Maintain mown terraces; manure fertilisation; collective parcel allocation; agri-environmental subsidies                                                                                               | What: Harvest by mowing                                                             | What: build stocks and stabilise farm income                                                                                                                                     |
|                                                                                                                             |                                                                                                   |                                                                                                                                                                |                                                                                                          | Who: farmers                                                                                                                                                                                                 | Who: farmers, motivated inhabitants and possibly tourists                           | Who: farmers                                                                                                                                                                     |

|                        |                |                               |                                                    |                                                                                                                                                                                   |                                                                                                                                                                                   |                                                                                                                                                                                   |
|------------------------|----------------|-------------------------------|----------------------------------------------------|-----------------------------------------------------------------------------------------------------------------------------------------------------------------------------------|-----------------------------------------------------------------------------------------------------------------------------------------------------------------------------------|-----------------------------------------------------------------------------------------------------------------------------------------------------------------------------------|
|                        |                |                               | resistance to drought                              | Human factors: Labour, Knowledge and skills                                                                                                                                       | Human factors: full or part time labour. Knowledge and skills on traditional and novel harvesting techniques.                                                                     | Human factors: hay storing knowledge and skills; farm technical and financial management knowledge and skills                                                                     |
|                        |                |                               |                                                    | Social factors: Collective terrace management, ensure equitable distribution of parcels across farmers, Attachment to mown terraces                                               | Social factors: Solidarity and ability to work together. Access to parcels (tracks). Communication to tourists for participation in mowing                                        | Social factors: collective hay conditioning and drying structures; solidarity across farmers                                                                                      |
|                        |                |                               |                                                    | Manufactured factors: Technology and innovation for fertilising and maintaining / upgrading terraces. Tracks for access to parcels                                                | Manufactured factors: Technology and innovation for mowing. Tracks for access to parcels                                                                                          | Manufactured factors: hay drying and storing technology and innovation, barns                                                                                                     |
|                        |                |                               |                                                    | Financial factors: Financial support for young farmers. Loans and/or collective funding for new equipment. Subsidies? Income from sales of agricultural products and from tourism | Financial factors: Financial support for young farmers. Loans and/or collective funding for new equipment. Subsidies? Income from sales of agricultural products and from tourism | Financial factors: Financial support for young farmers. Loans and/or collective funding for new equipment. Subsidies? Income from sales of agricultural products and from tourism |
| Shade for stock        | Increased ES   | grazed terraces, larch forest | deciduous trees / shrubs, larch                    | What: manage larch forest, plant trees on unmown terraces                                                                                                                         | What: include understory grazing in livestock management; predator protection                                                                                                     | What: ??[co-benefit harvest wood and NTFP is NOT included here as a different AS]                                                                                                 |
|                        |                |                               |                                                    | Who: farmers, tree planting / harvesting companies or individuals                                                                                                                 | Who: farmers, shepherds                                                                                                                                                           | Who: farmers                                                                                                                                                                      |
|                        |                |                               |                                                    | Human factors: larch meadow and tree planting / management knowledge and skills                                                                                                   | Human factors: grazing management knowledge; new knowledge for managing stock during hot weather; new knowledge and skills for predator protection                                | Human factors:                                                                                                                                                                    |
|                        |                |                               |                                                    | Social factors: collective decision on tree planting location (parcel allocation), access tracks                                                                                  | Social factors: collective grazing management, collective predator strategies                                                                                                     | Social factors:                                                                                                                                                                   |
|                        |                |                               |                                                    | Manufactured factors: tree planting and management equipment, access tracks                                                                                                       | Manufactured factors: fencing, shelter for shepherds                                                                                                                              | Manufactured factors:                                                                                                                                                             |
|                        |                |                               |                                                    | Financial factors: Subsidies, PES..., Income from sales of agricultural products and from tourism                                                                                 | Financial factors: subsidies for mountain farming, income from wood products and from NTFP                                                                                        | Financial factors:                                                                                                                                                                |
| Landscape connectivity | Transformation | P. paniculata grasslands      | large, connected areas of P. paniculata grasslands | What: not intentional (co-benefit of historical mowing cessation).                                                                                                                | What: None                                                                                                                                                                        | What: None (Passive benefit)                                                                                                                                                      |
|                        |                |                               |                                                    | Who: -                                                                                                                                                                            | Who: -                                                                                                                                                                            | Who: -                                                                                                                                                                            |
|                        |                |                               |                                                    | Human factors: -                                                                                                                                                                  | Human factors: -                                                                                                                                                                  | Human factors: -                                                                                                                                                                  |
|                        |                |                               |                                                    | Social factors: -                                                                                                                                                                 | Social factors: -                                                                                                                                                                 | Social factors: -                                                                                                                                                                 |
|                        |                |                               |                                                    | Manufactured factors: -                                                                                                                                                           | Manufactured factors: -                                                                                                                                                           | Manufactured factors: -                                                                                                                                                           |
|                        |                |                               |                                                    | Financial factors: -                                                                                                                                                              | Financial factors: -                                                                                                                                                              | Financial factors: -                                                                                                                                                              |

**Case study: Lake Faguibine, Mali**

| <b>Adaptation service (AS)</b>                                                                                                       | <b>AS type</b> | <b>Ecosystem or land use</b>  | <b>Key ecosystem elements</b>                                                                                       | <b>Type 1 co-production (ecosystem and landscape management)</b>                                                                                                                       | <b>Type 2 co-production (mobilization, harvesting, physical access)</b>                                                                              | <b>Type 3 co-production (appropriation, social access, appreciation)</b>                                                                                                        |
|--------------------------------------------------------------------------------------------------------------------------------------|----------------|-------------------------------|---------------------------------------------------------------------------------------------------------------------|----------------------------------------------------------------------------------------------------------------------------------------------------------------------------------------|------------------------------------------------------------------------------------------------------------------------------------------------------|---------------------------------------------------------------------------------------------------------------------------------------------------------------------------------|
| New forest products (charcoal, handicrafts)                                                                                          | Novel ES       | New forests                   | Fertile soil in the former lake beds, colonized by invasive trees introduced in the surroundings of the former lake | What: No action (natural regeneration, not managed).                                                                                                                                   | What: Harvesting wood                                                                                                                                | What: Transforming wood into charcoal or handicraft, transporting and selling them.                                                                                             |
|                                                                                                                                      |                |                               |                                                                                                                     | Who: Nobody                                                                                                                                                                            | Who: Women from the lowest social class                                                                                                              | Who: Women                                                                                                                                                                      |
|                                                                                                                                      |                |                               |                                                                                                                     | Human factors: No knowledge or tradition of forest management (impeding management, which is needed to avoid that the forest become impenetrable)                                      | Human factors: Workforce                                                                                                                             | Human factors: workforce, skills for product transformation                                                                                                                     |
|                                                                                                                                      |                |                               |                                                                                                                     | Social factors: Unclear rights on forests (restricting management).                                                                                                                    | Social factors: No social restriction on forest harvesting by women of this social group. Unclear right on access and use (facilitating harvesting). | Social factors: Culture and taboo restricting the production of charcoal by women from higher social class (restricting the use of this AS for some people but not for others). |
|                                                                                                                                      |                |                               |                                                                                                                     | Manufactured factors: -                                                                                                                                                                | Manufactured factors: -                                                                                                                              | Manufactured factors: Limited (perhaps cars or trucks for transportation to markets, although donkeys are more useful than trucks)                                              |
|                                                                                                                                      |                |                               |                                                                                                                     | Financial factors: -                                                                                                                                                                   | Financial factors: -                                                                                                                                 | Financial factors: -                                                                                                                                                            |
| Fodder production in the forested lake                                                                                               | Novel ES       | New forests                   | Fertile soil in the former lake beds, colonized by grass and trees                                                  | What: None (natural regeneration, not managed). The lack of management is a risk because the forest becomes impenetrable to animals.                                                   | What: Letting small animals (goats, sheep) graze there.                                                                                              | What: Transforming, consuming and selling animal products.                                                                                                                      |
|                                                                                                                                      |                |                               |                                                                                                                     | Who: Nobody                                                                                                                                                                            | Who: Herders                                                                                                                                         | Who: Everyone                                                                                                                                                                   |
|                                                                                                                                      |                |                               |                                                                                                                     | Human factors: No knowledge or tradition of forest management (impeding management)                                                                                                    | Human factors: Limited workforce (time?). Herding skills                                                                                             | Human factors: workforce, skills for product transformation                                                                                                                     |
|                                                                                                                                      |                |                               |                                                                                                                     | Social factors: Unclear rights on forests (restricting management).                                                                                                                    | Social factors: No social regulation of access                                                                                                       | Social factors: traditions, social networks for marketing                                                                                                                       |
|                                                                                                                                      |                |                               |                                                                                                                     | Manufactured factors: -                                                                                                                                                                | Manufactured factors: -                                                                                                                              | Manufactured factors: -                                                                                                                                                         |
|                                                                                                                                      |                |                               |                                                                                                                     | Financial factors: -                                                                                                                                                                   | Financial factors: -                                                                                                                                 | Financial factors: -                                                                                                                                                            |
| Crop production in areas of Lake Faguibine where irrigation is still possible despite drastic environmental changes in the lake area | Sustained ES   | Irrigated agricultural fields | Water availability in the Niger river and some part of the lake, soil fertility in the former lake beds,            | What: Farming (preparing land, sowing, watering...)                                                                                                                                    | What: Harvesting products                                                                                                                            | What: Transforming, consuming and selling agricultural products.                                                                                                                |
|                                                                                                                                      |                |                               |                                                                                                                     | Who: Farmers, mostly male.                                                                                                                                                             | Who: Farmers, mostly male.                                                                                                                           | Who: Farmers + their families                                                                                                                                                   |
|                                                                                                                                      |                |                               |                                                                                                                     | Human factors: Workforce, farming skills, knowledge of farmers (who knew the good old times, persistent knowledge)                                                                     | Human factors: Workforce, farming skill                                                                                                              | Human factors: Workforce, transformation skills, marketing skills                                                                                                               |
|                                                                                                                                      |                |                               |                                                                                                                     | Social factors: Social networks to access land. Common desire to go back to the old times when the lake was full. Political promises to make the water come back (encouraging farmers) | Social factors: - (the important social factors are for access to land and are related to management)                                                | Social factors: social networks for marketing                                                                                                                                   |
|                                                                                                                                      |                |                               |                                                                                                                     | Manufactured factors: Agricultural tools, Canals to bring water to the lake (a lot of engineering and maintenance in the past).                                                        | Manufactured factors: Agricultural tools                                                                                                             | Manufactured factors: car/trucks in some cases                                                                                                                                  |
|                                                                                                                                      |                |                               |                                                                                                                     | Financial factors: Capital to buy inputs, need to pay for using lands                                                                                                                  | Financial factors: -                                                                                                                                 | Financial factors: -                                                                                                                                                            |
| Fodder production in the grasslands around the lake                                                                                  | Persistent ES  | Grasslands                    | Soil, grass, occasional rains                                                                                       | What: None (no real direct management, indirect management through decisions about where to graze: see "Mobilization")                                                                 | What: Herding                                                                                                                                        | What: Transforming, consuming and selling animal products.                                                                                                                      |
|                                                                                                                                      |                |                               |                                                                                                                     | Who: -                                                                                                                                                                                 | Who: Herders                                                                                                                                         | Who: Herders + their families                                                                                                                                                   |
|                                                                                                                                      |                |                               |                                                                                                                     | Human factors: -                                                                                                                                                                       | Human factors: Workforce, Herding skills, Knowledge about transhumance and fodder/water availability.                                                | Human factors: Workforce, transformation skills, marketing skills                                                                                                               |

|                                                        |                                                             |                               |                                                                       |                                                                                                                                                                                                                                                                                                                                                             |                                                                                                                                                                                                                                 |                                                                                                                                                                                                                                                                                   |
|--------------------------------------------------------|-------------------------------------------------------------|-------------------------------|-----------------------------------------------------------------------|-------------------------------------------------------------------------------------------------------------------------------------------------------------------------------------------------------------------------------------------------------------------------------------------------------------------------------------------------------------|---------------------------------------------------------------------------------------------------------------------------------------------------------------------------------------------------------------------------------|-----------------------------------------------------------------------------------------------------------------------------------------------------------------------------------------------------------------------------------------------------------------------------------|
|                                                        |                                                             |                               |                                                                       | Social factors: -                                                                                                                                                                                                                                                                                                                                           | Social factors: Social networks, exchanges of information about pasture availability, Strong traditions of livestock breeding, Life style, Restrictions because of conflicts (wars) and policies (restrictions to transhumance) | Social factors: social networks for marketing                                                                                                                                                                                                                                     |
|                                                        |                                                             |                               |                                                                       | Manufactured factors: -                                                                                                                                                                                                                                                                                                                                     | Manufactured factors: -                                                                                                                                                                                                         | Manufactured factors: car/trucks in some cases                                                                                                                                                                                                                                    |
|                                                        |                                                             |                               |                                                                       | Financial factors: -                                                                                                                                                                                                                                                                                                                                        | Financial factors: Little                                                                                                                                                                                                       | Financial factors: -                                                                                                                                                                                                                                                              |
| Crop production around the lake when the lake was full | Decreasing ES (but could come back if the lake is refilled) | Irrigated agricultural fields | Water availability in the Niger river, soil fertility around the lake | What: Farming (preparing land, sowing, watering...) + Engineering works to maintain water levels in the lake.<br>Who: Farmers + Engineers, development projects, foreign aid<br>Human factors: Farming workforce and skills + Engineering workforce and knowledge<br>Social factors: Social networks to access land                                         | What: Harvesting products<br>Who: Farmers, mostly male.<br>Human factors: Workforce, farming skill<br>Social factors: - (the important social factors are for access to land and are related to management)                     | What: Transforming, consuming and selling agricultural products.<br>Who: Farmers + their families<br>Human factors: Workforce, transformation skills, marketing skills<br>Social factors: social networks for marketing                                                           |
|                                                        |                                                             |                               |                                                                       | Manufactured factors: Agricultural tools + Infrastructure & Machinery                                                                                                                                                                                                                                                                                       | Manufactured factors: Agricultural tools                                                                                                                                                                                        | Manufactured factors: car/trucks in some cases                                                                                                                                                                                                                                    |
|                                                        |                                                             |                               |                                                                       | Financial factors: Capital to buy inputs and to access lands + Important external funding for water infrastructure                                                                                                                                                                                                                                          | Financial factors: -                                                                                                                                                                                                            | Financial factors: -                                                                                                                                                                                                                                                              |
| Fish production previously in the lake                 | Decreasing ES (but could come back if the lake is refilled) | Aquatic system                | Lake, fish populations                                                | What: No direct fish management but indirect management through engineering works to maintain water levels in the lake<br>Who: Engineers, development projects, foreign aid<br>Human factors: Workforce, engineering knowledge<br>Social factors: ?<br>Manufactured factors: Machinery, dams, canals, etc.<br>Financial factors: Important external funding | What: Fishing<br>Who: Fishermen<br>Human factors: Workforce and skills<br>Social factors: ?<br>Manufactured factors: boat, fishing material<br>Financial factors: for material                                                  | What: Transforming, consuming and selling fish<br>Who: Fishermen + their families<br>Human factors: Workforce, transformation skills, marketing skills<br>Social factors: social networks for marketing<br>Manufactured factors: car/trucks in some cases<br>Financial factors: - |

**Case study: Kalimantan and Java, Indonesia**

| <b>Adaptation service (AS)</b>                                                                    | <b>AS type</b>                                       | <b>Ecosystem or land use</b>              | <b>Key ecosystem elements</b> | <b>Type 1 co-production (ecosystem and landscape management)</b>                                                               | <b>Type 2 co-production (mobilization, harvesting, physical access)</b>                                                                     | <b>Type 3 co-production (appropriation, social access, appreciation)</b> |
|---------------------------------------------------------------------------------------------------|------------------------------------------------------|-------------------------------------------|-------------------------------|--------------------------------------------------------------------------------------------------------------------------------|---------------------------------------------------------------------------------------------------------------------------------------------|--------------------------------------------------------------------------|
| Water regulation, flood protection, in synergies with agricultural production resilient to floods | Sustained ES (human-modified ecosystems but same ES) | Forests and tree plantations              | Vegetation and soils          | What: planting and maintaining rubber trees, enforcing forest protection.                                                      | What: No mobilization need for flood protection. Mobilization for rubber harvesting (same as for other crop harvesting: not described here) | What: Appreciating safety and incomes.                                   |
|                                                                                                   |                                                      |                                           |                               | Who: farmers, villagers.                                                                                                       | Who:                                                                                                                                        | Who: Farmers and villagers.                                              |
|                                                                                                   |                                                      |                                           |                               | Human factors: workforce, skills, knowledge.                                                                                   | Human factors: -                                                                                                                            | Human factors: -                                                         |
|                                                                                                   |                                                      |                                           |                               | Social factors: Strength of community rules. Social cohesion and interaction allow enforcement of rules that restrict logging. | Social factors: -                                                                                                                           | Social factors: Social learning                                          |
|                                                                                                   |                                                      |                                           |                               | Manufactured factors: Limited.                                                                                                 | Manufactured factors: -                                                                                                                     | Manufactured factors: -                                                  |
|                                                                                                   |                                                      |                                           |                               | Financial factors: Some to relocate houses and fields from flood-prone areas.                                                  | Financial factors: -                                                                                                                        | Financial factors: -                                                     |
| Water regulation                                                                                  | Sustained ES (human-modified ecosystems but same ES) | Natural regeneration and tree plantations | Vegetation and soils          | What: Planting and maintaining trees                                                                                           | What: building and managing irrigation infrastructure (that helps farmers benefit from water regulation)                                    | What: Using water for farming or consuming                               |
|                                                                                                   |                                                      |                                           |                               | Who: Farmers, villagers.                                                                                                       | Who: Farmers, villagers.                                                                                                                    | Who: Farmers, villagers.                                                 |
|                                                                                                   |                                                      |                                           |                               | Human factors: workforce, skills, knowledge                                                                                    | Human factors: workforce, skills, knowledge                                                                                                 | Human factors: knowledge                                                 |
|                                                                                                   |                                                      |                                           |                               | Social factors: possibly collective work.                                                                                      | Social factors: collective work, cohesion                                                                                                   | Social factors: sharing agreement                                        |
|                                                                                                   |                                                      |                                           |                               | Manufactured factors: tools                                                                                                    | Manufactured factors: some                                                                                                                  | Manufactured factors:                                                    |
|                                                                                                   |                                                      |                                           |                               | Financial factors: limited                                                                                                     | Financial factors: some                                                                                                                     | Financial factors:                                                       |

**Case study: Andes, Peru**

| <b>Adaptation service (AS)</b> | <b>AS type</b>                                                                                              | <b>Ecosystem or land use</b>                                                  | <b>Key ecosystem elements</b> | <b>Type 1 co-production (ecosystem and landscape management)</b>                                   | <b>Type 2 co-production (mobilization, harvesting, physical access)</b>                                 | <b>Type 3 co-production (appropriation, social access, appreciation)</b> |
|--------------------------------|-------------------------------------------------------------------------------------------------------------|-------------------------------------------------------------------------------|-------------------------------|----------------------------------------------------------------------------------------------------|---------------------------------------------------------------------------------------------------------|--------------------------------------------------------------------------|
| Water regulation               | Persistent ES (by conserved or restored ecosystems). Sustained ES (by ecosystems transformed by management) | Wetlands, small ponds, grasslands with traditional aquifer recharge practices | Soil, topography, grass       | What: Installing fences, building small reservoirs or canals.                                      | What: Building and maintaining infrastructure to transport water to fields, rural settlements or cities | What: Using water for farming or consuming                               |
|                                |                                                                                                             |                                                                               |                               | Who: Communities                                                                                   | Who: Communities, private sector                                                                        | Who: Farmers, villagers.                                                 |
|                                |                                                                                                             |                                                                               |                               | Human factors: Workforce, skills, knowledge                                                        | Human factors: Workforce, skills, knowledge                                                             | Human factors: knowledge                                                 |
|                                |                                                                                                             |                                                                               |                               | Social factors: Cohesion (collective work)                                                         | Social factors: Water sharing agreements                                                                | Social factors: sharing agreement                                        |
|                                |                                                                                                             |                                                                               |                               | Manufactured factors: Limited.                                                                     | Manufactured factors: Canals, pipes, etc. for water transportation and management                       | Manufactured factors: For some uses                                      |
| Financial factors: limited     | Financial factors: Large investments                                                                        | Financial factors: Fee payment (cities and large irrigated areas)             |                               |                                                                                                    |                                                                                                         |                                                                          |
| Fodder production              | Persistent ES (by conserved or restored ecosystems). Sustained ES (by ecosystems transformed by management) | Grazed grasslands and wetlands                                                | Soil fertility, grass, water  | What: None (no real direct management, indirect management through decisions about where to graze) | What: Herding                                                                                           | What: Transforming, consuming and selling animal products.               |
|                                |                                                                                                             |                                                                               |                               | Who: -                                                                                             | Who: Community members                                                                                  | Who: Community members                                                   |
|                                |                                                                                                             |                                                                               |                               | Human factors: -                                                                                   | Human factors: Workforce, Herding skills,                                                               | Human factors: Workforce, transformation skills, marketing skills        |
|                                |                                                                                                             |                                                                               |                               | Social factors: -                                                                                  | Social factors: Social networks, Access rules                                                           | Social factors: social networks for marketing                            |
|                                |                                                                                                             |                                                                               |                               | Manufactured factors: -                                                                            | Manufactured factors: -                                                                                 | Manufactured factors: car/trucks in some cases                           |
| Financial factors: -           | Financial factors: Little                                                                                   | Financial factors: -                                                          |                               |                                                                                                    |                                                                                                         |                                                                          |

**Case study: Solomon Islands**

| <b>Adaptation service (AS)</b>                       | <b>AS type</b>                                                                                                                                              | <b>Ecosystem or land use</b>                       | <b>Key ecosystem elements</b>                                       | <b>Type 1 co-production (ecosystem and landscape management)</b>                                                                                                                 | <b>Type 2 co-production (mobilization, harvesting, physical access)</b>                                                                                                                                   | <b>Type 3 co-production (appropriation, social access, appreciation)</b>                                                                                                       |
|------------------------------------------------------|-------------------------------------------------------------------------------------------------------------------------------------------------------------|----------------------------------------------------|---------------------------------------------------------------------|----------------------------------------------------------------------------------------------------------------------------------------------------------------------------------|-----------------------------------------------------------------------------------------------------------------------------------------------------------------------------------------------------------|--------------------------------------------------------------------------------------------------------------------------------------------------------------------------------|
| New food production systems to improve food security | Novel ES (production systems that did not exist before detrimental effects of sea level rise)                                                               | Cropping and permaculture plantings in raised beds | Water, soil, biogeochemical cycling of organic matter, solar energy | What: building permaculture beds using coconut husks, compost and powdered limestone or coral<br>Who: community & NGOs                                                           | What: maintenance of beds, harvest produce, distribute food, replant beds<br>Who: community                                                                                                               | Consumption and trade of locally-grown food;<br>Who: growers & their families, recipients of traded food items                                                                 |
|                                                      |                                                                                                                                                             |                                                    |                                                                     | Human factors: workforce - mostly women, transfer of skills & knowledge from NGOs to community<br>Social factors: cohesion (collective work)                                     | Human factors: women gardeners engage others & transfer knowledge<br>Social factors: community support & engagement in permaculture                                                                       | Human factors: knowledge of food storage<br>Social factors: establishing rules for allocation from growers to other community members not involved in food production          |
|                                                      |                                                                                                                                                             |                                                    |                                                                     | Manufactured factors: basic tools; initial requirement to source propagules of food plant varieties; building water supply - rainwater tanks<br>Financial factors: aid from NGOs | Manufactured factors: compost & organic matter to maintain beds; maintain & ensure reliable water supply<br>Financial factors: community savings clubs, savings from not having to purchase imported food | Manufactured factors: storage of root crops and preservation of perishable items<br>Financial factors: establishing rules of trade and commensurate value for trade and barter |
|                                                      |                                                                                                                                                             |                                                    |                                                                     |                                                                                                                                                                                  |                                                                                                                                                                                                           |                                                                                                                                                                                |
| New land- and sea-based livelihoods                  | Novel ES (transformation of atoll drives migration to new islands & ecosystems). Sustained ES (where the same ES are used in new locations as on the atoll) | New land- and coast-scapes on other islands        | Whole-of ecosystem                                                  | What: migrating to new islands, adopting new land & sea uses - development of new food production systems<br>Who: community migrants from atoll                                  | What: acquisition of land & knowledge for smallholder farming & forestry; access to boats & equipment for fishing<br>Who: migrant community                                                               | What: developing rules and norms on land use and food production and development of markets and trading systems<br>Who: migrant community & adoptive community                 |
|                                                      |                                                                                                                                                             |                                                    |                                                                     | Human factors: networks of migrants and existing Ontong Javan diaspora<br>Social factors: collective decisions on options for relocation                                         | Human factors: knowledge transfer from existing residents<br>Social factors: co-learning by doing together                                                                                                | Human factors: engagement with adoptive community<br>Social factors: use by migrants of existing local networks in adoptive community, as well as with expatriate network      |
|                                                      |                                                                                                                                                             |                                                    |                                                                     | Manufactured factors: basic farming equipment, boats & fishing equipment<br>Financial factors: support from government, NGOs, extended family, remittances                       | Manufactured factors: farming and fishing equipment<br>Financial factors: income from production, loans, NGO support                                                                                      | Manufactured factors: access to transport & communications<br>Financial factors: engagement in cash economy - for the first time for many people;                              |
|                                                      |                                                                                                                                                             |                                                    |                                                                     |                                                                                                                                                                                  |                                                                                                                                                                                                           |                                                                                                                                                                                |

**Case study: Murray-Darling Basin, Australia**

| <b>Adaptation service (AS)</b>                                                                                  | <b>AS type</b>                                                                                    | <b>Ecosystem or land use</b>                                                         | <b>Key ecosystem elements</b>                                                                       | <b>Type 1 co-production (ecosystem and landscape management)</b>                                                                                                                                                                         | <b>Type 2 co-production (mobilization, harvesting, physical access)</b>                                                                                                                       | <b>Type 3 co-production (appropriation, social access, appreciation)</b>                                                                                                 |
|-----------------------------------------------------------------------------------------------------------------|---------------------------------------------------------------------------------------------------|--------------------------------------------------------------------------------------|-----------------------------------------------------------------------------------------------------|------------------------------------------------------------------------------------------------------------------------------------------------------------------------------------------------------------------------------------------|-----------------------------------------------------------------------------------------------------------------------------------------------------------------------------------------------|--------------------------------------------------------------------------------------------------------------------------------------------------------------------------|
| New grazing systems: fodder from chenopod shrubland                                                             | Novel ES (transformation of riverine plains from myall woodland to chenopod shrubland)            | Floodplain pastures                                                                  | Plant functional diversity & response to flood & drought; water availability                        | What: development of sustainable, low-input grazing systems on saline land, based on chenopod shrubs sustainable wool production and the emergence of a sustainable wool industry and a high-value saltbush sheep and goat meat industry | What: application of knowledge on dietary requirements and tolerances of sheep & goats for chenopod shrubs; development of a system for finishing production of lambs on high protein cereals | What: establishment of markets for saltbush lamb and goat meat                                                                                                           |
|                                                                                                                 |                                                                                                   |                                                                                      |                                                                                                     | Who: graziers, extension officers, researchers, government agencies                                                                                                                                                                      | Who: graziers, extension officers, researchers, government agencies                                                                                                                           | Who: graziers, wholesalers, market supply chain, customers                                                                                                               |
|                                                                                                                 |                                                                                                   |                                                                                      |                                                                                                     | Human factors: graziers developing knowledge by experimentation and practice of new wool and lamb production systems                                                                                                                     | Human factors: partnerships between graziers and animal production scientists; saltland farmer associations                                                                                   | Human factors: partnerships between graziers and animal production scientists                                                                                            |
|                                                                                                                 |                                                                                                   |                                                                                      |                                                                                                     | Social factors: The Land, Water and Wool Sustainable Grazing on Saline Lands initiative: co-production of knowledge; learning by doing and sharing                                                                                       | Social factors: networks of graziers, field days, demonstration sites, websites, newsletters                                                                                                  | Social factors: profitable, sustainable production systems benefit local & regional communities & economy                                                                |
|                                                                                                                 |                                                                                                   |                                                                                      |                                                                                                     | Manufactured factors: landscape was transformed by clearing in 19th Century                                                                                                                                                              | Manufactured factors: farm fencing for holding & finishing paddocks                                                                                                                           | Manufactured factors: physical infrastructure that supports supply chains, e.g. local abattoir                                                                           |
| Financial factors: government grants, subsidies & incentives                                                    | Financial factors: government grants, subsidies & incentives                                      | Financial factors: regional assistance grants, re-investment back into the community |                                                                                                     |                                                                                                                                                                                                                                          |                                                                                                                                                                                               |                                                                                                                                                                          |
| Control of dryland salinity                                                                                     | Transformation from degraded saline land to productive pastures                                   | Floodplain pastures                                                                  | Soil properties, plant salt tolerances, water use and uptake, root architecture, perennality        | What: revegetating salt-affected land with saltland pasture species                                                                                                                                                                      | What: appropriate design & planting with saltbush, native grasses, wheat grass & bluebush; surface water management                                                                           | What: benefits of reduced saline water table at farm-scale and benefits for water and land management at catchment-to-regional scale from management of dryland salinity |
|                                                                                                                 |                                                                                                   |                                                                                      |                                                                                                     | Who: graziers, government advisory staff                                                                                                                                                                                                 | Who: graziers, revegetation contractors                                                                                                                                                       | Who: farmers, catchment managers, regional communities                                                                                                                   |
|                                                                                                                 |                                                                                                   |                                                                                      |                                                                                                     | Human factors: knowledge on how to revegetate successfully - practical guidebooks, extension services; saltland farmer associations                                                                                                      | Human factors: labour and expertise - knowledge and skills of landscape rehabilitation                                                                                                        | Human factors: stakeholders and beneficiaries from improved surface water quality & rehabilitated, productive farmscapes                                                 |
|                                                                                                                 |                                                                                                   |                                                                                      |                                                                                                     | Social factors: The Land, Water and Wool Sustainable Grazing on Saline Lands Initiative as a focal group for co-ordination of activities                                                                                                 | Social factors: engagement of farmers & community groups in sharing knowledge about benefits of rehabilitating saline land, effectiveness & ongoing management                                | Social factors: rehabilitated landscapes promote social cohesion and community wellbeing                                                                                 |
|                                                                                                                 |                                                                                                   |                                                                                      |                                                                                                     | Manufactured factors: revegetation seeder equipment, seedbanks, propagule supply                                                                                                                                                         | Manufactured factors: revegetation seeder equipment, seedbanks, propagule supply                                                                                                              | Manufactured factors: None                                                                                                                                               |
| Financial factors: government grants and subsidies                                                              | Financial factors: farmer investment in revegetation; improved profitability                      | Financial factors: increased land value                                              |                                                                                                     |                                                                                                                                                                                                                                          |                                                                                                                                                                                               |                                                                                                                                                                          |
| Erosion control                                                                                                 | Latent ES                                                                                         | Floodplain pastures                                                                  | Soil physical properties; plant root architecture; intensity and frequency of rainfall and flooding | What: control of stocking rates & grazing on saltbush pastures through rotational grazing; manage and encourage regeneration of chenopod shrubs                                                                                          | What: experimentation with stocking and rotational grazing to determine optimal stocking rates that maintain healthy chenopod shrubland                                                       | What: production system is optimised and profitable without damage to underpinning resource base; runoff of soil to creeks and rivers is minimised                       |
|                                                                                                                 |                                                                                                   |                                                                                      |                                                                                                     | Who: graziers, extension officers                                                                                                                                                                                                        | Who: graziers                                                                                                                                                                                 | Who: graziers, catchment managers                                                                                                                                        |
|                                                                                                                 |                                                                                                   |                                                                                      |                                                                                                     | Human factors: knowledge on how to manage landscape to maintain natural erosion prevention afforded by vegetation community                                                                                                              | Human factors: graziers share knowledge about optimal stocking rates to minimise erosion                                                                                                      | Human factors: development of knowledge and expertise                                                                                                                    |
| Social factors: Sustainable Grazing on Saline Lands Initiative as a focal group for co-ordination of activities | Social factors: networks of graziers, field days, demonstration sites, websites, newsletters etc. | Social factors: social networks for knowledge exchange                               |                                                                                                     |                                                                                                                                                                                                                                          |                                                                                                                                                                                               |                                                                                                                                                                          |



|                             |                                                                                                                                                                                        |                                        |                      |                                                                                                                                    |                                                                                                                                      |                                                                                                                                                           |
|-----------------------------|----------------------------------------------------------------------------------------------------------------------------------------------------------------------------------------|----------------------------------------|----------------------|------------------------------------------------------------------------------------------------------------------------------------|--------------------------------------------------------------------------------------------------------------------------------------|-----------------------------------------------------------------------------------------------------------------------------------------------------------|
|                             |                                                                                                                                                                                        |                                        |                      | Manufactured factors: technology and innovation for maintaining and managing chenopod shrubland & rehabilitation of degraded areas | Manufactured factors: machinery for remediating erosion and re-seeding saltbush on degraded land                                     | Manufactured factors: networks for equipment exchange                                                                                                     |
|                             |                                                                                                                                                                                        |                                        |                      | Financial factors: government grants, subsidies & incentives; investment by graziers                                               | Financial factors: farmer investment in revegetation; subsidies, grants                                                              | Financial factors: avoided costs of loss of production and remediation                                                                                    |
| Management of water quality | Persistent ES (water quality declined following land clearing and salinity, but capacity for improved water quality has increased with ecosystem transformation to chenopod shrubland) | Floodplain pastures and riparian zones | Vegetation and soils | What: Maintenance of water quality for catchment and livestock health; fencing riparian zones, control of stock watering access    | What: maintenance and restoration of riparian areas on farms, including seasonal grazing to optimise seasonal availability of fodder | What: benefits from improved water quality are realised from farm to river-basin scale                                                                    |
|                             |                                                                                                                                                                                        |                                        |                      | Who: graziers                                                                                                                      | Who: graziers, contractors, Landcare groups                                                                                          | Who: graziers, catchment managers, communities                                                                                                            |
|                             |                                                                                                                                                                                        |                                        |                      | Human factors: development by graziers of management plans for riparian grazing and water access                                   | Human factors: planting and restoration of riparian zones by graziers and LandCare groups                                            | Human factors: raised awareness of benefits of water quality as an AS and community capacity for management & maintenance of waterways and riparian zones |
|                             |                                                                                                                                                                                        |                                        |                      | Social factors: Sustainable Grazing on Saline Lands Initiative as a focal group for exchange of knowledge on riparian management   | Social factors: networks of graziers and Landcare groups, demonstration sites, community activities                                  | Social factors: social networks for knowledge exchange                                                                                                    |
|                             |                                                                                                                                                                                        |                                        |                      | Manufactured factors: technology and innovation for managing riparian zones                                                        | Manufactured factors: fencing & related equipment                                                                                    | Manufactured factors: negligible                                                                                                                          |
|                             |                                                                                                                                                                                        |                                        |                      | Financial factors: government grants, subsidies & incentives; investment by graziers                                               | Financial factors: farmer investment in riparian management; subsidies, grants                                                       | Financial factors: avoided costs in water treatment, siltation; in-kind value of volunteer labour                                                         |

**Case study: Ganges-Brahmaputra-Meghna Delta, Bangladesh**

| <b>Adaptation service (AS)</b>               | <b>AS type</b>                                                                                              | <b>Ecosystem or land use</b>                                  | <b>Key ecosystem elements</b>                                                       | <b>Type 1 co-production (ecosystem and landscape management)</b>                                                                      | <b>Type 2 co-production (mobilization, harvesting, physical access)</b>                                                       | <b>Type 3 co-production (appropriation, social access, appreciation)</b>                                                                                |
|----------------------------------------------|-------------------------------------------------------------------------------------------------------------|---------------------------------------------------------------|-------------------------------------------------------------------------------------|---------------------------------------------------------------------------------------------------------------------------------------|-------------------------------------------------------------------------------------------------------------------------------|---------------------------------------------------------------------------------------------------------------------------------------------------------|
| New production systems for food security     | Transformation                                                                                              | Saltmarsh and coastal flats                                   | Freshwater supply, salinity regulation, drainage, nutrient cycling & soil fertility | What: establishment of ditch-and-dyke permaculture and aquaculture system on barren land inland of mangrove forests                   | What: production of fruit trees & vegetables on dykes irrigated with rainwater from adjacent ditches used for fish production | What: benefits from improved food security and healthy, diverse diet; poverty alleviation                                                               |
|                                              |                                                                                                             |                                                               |                                                                                     | Who: local communities, government officers, NGOs                                                                                     | Who: local communities, government officers                                                                                   | Who: local communities                                                                                                                                  |
|                                              |                                                                                                             |                                                               |                                                                                     | Human factors: community labour constructs dykes by excavating ditches                                                                | Human factors: families plant & maintain allocated land & ditch                                                               | Human factors: development of permaculture skills                                                                                                       |
|                                              |                                                                                                             |                                                               |                                                                                     | Social factors: autonomous family livelihoods & decision-making                                                                       | Social factors: community support for program & active engagement in permaculture                                             | Social factors: improved diversity of livelihoods & community wellbeing                                                                                 |
|                                              |                                                                                                             |                                                               |                                                                                     | Manufactured factors: tree nurseries, seedbanks                                                                                       | Manufactured factors: trees and seeds distributed & planted                                                                   | Manufactured factors: transport of produce to markets                                                                                                   |
| Coastal protection from erosion & inundation | Transformation                                                                                              | Newly accreted coastal flats                                  | Water, soil, biogeochemical cycling of organic matter, solar energy                 | What: planting of newly-accreted mudflat with mangrove species                                                                        | What: design and planting of multiple mangrove spp. with high response diversity to climate change & sea level rise           | What: benefits to coastal communities from protection from storm surges and flooding; harvesting of mangroves for fuelwood                              |
|                                              |                                                                                                             |                                                               |                                                                                     | Who: local communities, government officers, NGOs                                                                                     | Who: local communities, government officers                                                                                   | Who: local communities                                                                                                                                  |
|                                              |                                                                                                             |                                                               |                                                                                     | Human factors: volunteer labour                                                                                                       | Human factors: volunteer labour                                                                                               | Human factors: local people recognise and appreciate the function of mangroves in reducing flood risk & storm damage                                    |
|                                              |                                                                                                             |                                                               |                                                                                     | Social factors: the Community Based Adaptation to Climate Change through Coastal Afforestation Program as a focal co-ordinating group | Social factors: engagement of communities in sharing knowledge about benefits of planting mangroves                           | Social factors: improved community livelihoods, food security and wellbeing                                                                             |
|                                              |                                                                                                             |                                                               |                                                                                     | Manufactured factors: mangrove nurseries                                                                                              | Manufactured factors: mangrove seedlings distributed & hand planted                                                           | Manufactured factors: None                                                                                                                              |
| Forest products from mangroves               | Sustained or enhanced AS (ES of forest products from existing mangroves enhanced by new mangrove plantings) | Newly accreted coastal flats                                  | Water, soil, biogeochemical cycling of organic matter, solar energy                 | What: sustainable harvesting of mangrove for fuelwood, charcoal production                                                            | What: sustainable harvesting of mangrove timber, including pruning and coppicing                                              | What: co-benefits of mangroves in providing forest products including honey, habitat for fish and shellfish spawning and harvesting sites for shellfish |
|                                              |                                                                                                             |                                                               |                                                                                     | Who: local communities                                                                                                                | Who: local communities, government officers                                                                                   | Who: local communities                                                                                                                                  |
|                                              |                                                                                                             |                                                               |                                                                                     | Human factors: volunteer labour                                                                                                       | Human factors: volunteer labour                                                                                               | Human factors: local people appreciate co-benefits from mangroves in providing forest products                                                          |
|                                              |                                                                                                             |                                                               |                                                                                     | Social factors: development and knowledge exchange of sustainable harvesting and management                                           | Social factors: community engagement in harvesting fuelwood                                                                   | Social factors: local people appreciate the benefits of mangroves in providing forest products that they trade and exchange                             |
|                                              |                                                                                                             |                                                               |                                                                                     | Manufactured factors: negligible                                                                                                      | Manufactured factors: charcoal burning                                                                                        | Manufactured factors: transport to markets in some cases                                                                                                |
| Financial factors: negligible                | Financial factors: income from forest products                                                              | Financial factors: avoided costs by sourcing fuelwood locally |                                                                                     |                                                                                                                                       |                                                                                                                               |                                                                                                                                                         |
